# Supplementary material for: Inverted internal limiting membrane insertion combined with air tamponade in the treatment of macular hole retinal detachment in high myopia: study protocol for a randomized controlled clinical trial
Source: Trials. 2018 Aug 30;19:469. doi: 10.1186/s13063-018-2833-y (PMC6117933; doi:10.1186/s13063-018-2833-y)
Supplement: Supplementary file 2 — Attachments 1, 2 and 3 [Slit Lamp Examination Form (right eye)]. (DOCX 35 kb) [file 13063_2018_2833_MOESM2_ESM.docx]

**Attachment 1**

**【Slit Lamp Examination Form (right eye)】-I**

| Whether to have slit lamp examination (right eye)?：1□Yes→Please record as follows，0□No | |
| --- | --- |
| Other lesions of eyelid | 0□No  1□Yes，Please describe：_________________________________ |
| 1. Conjunctiva (right eye) | |
| Congestion | 0□Normal. It may appear white or reddish pink, without peripheral congestion. The conjunctival or bulbar conjunctival vessels are easily observed  1□Slight redness, reddish color, mainly confined to the palpebral conjunctiva or bulbar conjunctiva  2□Mild redness, reddish color, mainly confined to the conjunctiva or bulbar conjunctiva  3□Moderate, palpebral conjunctiva or bulbar conjunctiva is bright red  4□Severe, palpebral conjunctiva or bulbar conjunctiva is deep diffuse bright red |
| Edema | 0□Normal, no swelling  1□Slight, beyond normal and regional  2□Mild, mild conjunctival swelling, beyond normal, regional  3□Moderate, conjunctival swelling moderately  4□Severe, large conjunctival swelling |
| Subconjunctival hemorrhage | 0□Nil, no bleeding  1□Slight, flat and less than 1 quadrant  2□Mild, bulging, and 1 quadrant, or flat and more than 1 quadrants  3□Moderate, bulging and >1 quadrant, but less than 2 quadrants  4□Severe, bulging and more than 2 quadrants |
| Other conjunctival lesions | 0□No  1□Yes，Please describe：_________________________________ |
| 2. Cornea (right eye) | |
| Edema | 0□Nil, transparent and clear  1□Slight, micro and local epithelial haze  2□Mild, turbid vitreous appearance and may contain tiny droplets  3□Moderate, turbid vitreous appearance with a large number of vacuoles  4□Severe, bullous and / or stromal edema, localized or diffuse, with or without matrix streaks |
| Other corneal lesions | 0□No  1□Yes，Please describe：_________________________________ |

**【Slit Lamp Examination Form (right eye)】-I**

| 3. Anterior chamber (right eye) | |
| --- | --- |
| Cell number | 0□Nil, no cells  1□Slight, 1-5 cells  2□Mild, 6-25 cells  3□Moderate, 26-50 cells  4□Severe, the number of cells is too large to count |
| Anterior chamber flare | 0□Nil, no Tyndall effect  1□Slight, almost cannot distinguish the Tyndall effect  2□Mild, slight brightness  3□Moderate, strong brightness  4□Severe, very strong and aqueous humor is white or milky |
| Other lesions | 0□No  1□Yes，Please describe：_________________________________ |
| 4. Iris / pupil (right eye) | |
| Iris / pupil (right eye) | Clinically significant abnormality：0□No1□Yes，Please describe：_____________ |
| 5. Lens (right eye) | |
| Lens (right eye) | 1□Complete  2□Artificial  3□Nil |
| Other lesions | 0□No  1□Yes，Please describe：_________________________________ |
| Transparency | |
| Cortex | 0□Nil  1□There are turbidity, but below standard pictures 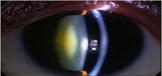  2□There are turbidity, and the severity of the standard picture is the same or more serious 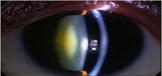  3□Not applicable |
| Nucleus | 0□Nil  1□Turbid, but below standard pictures 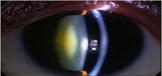  2□Turbid, the same or more serious than standard pictures 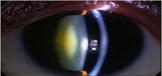  3□Not applicable |
| Posterior capsule | 0□Nil  1□Turbid, but below standard pictures 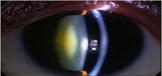  2□Turbid, the same or more serious than standard pictures 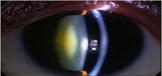  3□Not applicable |

**【Slit Lamp Examination Form (right eye)】-I**

| 6. Vitreum (right eye) | |
| --- | --- |
| Anterior vitreous cell count | 0□Nil, no cells  1□Slight, 1-10 cells  2□Mild, 11-30 cells  3□Moderate, 30-50 cells  4□Severe, >50 cells |
| Other lesions | 0□No  1□Yes，Please describe：_________________________________ |
| Vitreous / anterior retinal hemorrhage | 0□Nil  1□Slight  2□Mild  3□Moderate  4□Severe |
| 7. Macular and retina (right eye) | |
| Macular hole | 0□Nil  1□Hole diameter≤1/3PD  2□Hole diameter＞1/3PD, and≤1/2PD  3□Hole diameter＞1/2PD, and≤1PD  4□Hole diameter＞1PD |
| Retinal detachment | 0□Nil  1□Yes，Please describe：  1□Within the arcade  2□Beyond the arcade, and within the equator  3□Beyond the equator |
| Peripheral retinal split holes | 0□No  1□Yes，Please describe：_________________________________ |
| Posterior scleral staphyloma | 0□No  1□Yes，Please describe：_________________________________ |
| Other lesions | 0□No  1□Yes，Please describe with words or pictures：_________________________________ |

**Attachment 1**

**【Slit Lamp Examination Form (left eye)】-I**

| Whether to have slit lamp examination (left eye)?：1□Yes→Please record as follows，0□No | |
| --- | --- |
| Other lesions of eyelid | 0□No  1□Yes，Please describe：_________________________________ |
| 1. Conjunctiva (right eye) | |
| Congestion | 0□Normal. It may appear white or reddish pink, without peripheral congestion. The conjunctival or bulbar conjunctival vessels are easily observed  1□Slight redness, reddish color, mainly confined to the palpebral conjunctiva or bulbar conjunctiva  2□Mild redness, reddish color, mainly confined to the conjunctiva or bulbar conjunctiva  3□Moderate, palpebral conjunctiva or bulbar conjunctiva is bright red  4□Severe, palpebral conjunctiva or bulbar conjunctiva is deep diffuse bright red |
| Edema | 0□Normal, no swelling  1□Slight, beyond normal and regional  2□Mild, mild conjunctival swelling, beyond normal, regional  3□Moderate, conjunctival swelling moderately  4□Severe, large conjunctival swelling |
| Subconjunctival hemorrhage | 0□Nil, no bleeding  1□Slight, flat and less than 1 quadrant  2□Mild, bulging, and 1 quadrant, or flat and more than 1 quadrants  3□Moderate, bulging and >1 quadrant, but less than 2 quadrants  4□Severe, bulging and more than 2 quadrants |
| Other conjunctival lesions | 0□No  1□Yes，Please describe：_________________________________ |
| 2. Cornea (left eye) | |
| Edema | 0□Nil, transparent and clear  1□Slight, micro and local epithelial haze  2□Mild, turbid vitreous appearance and may contain tiny droplets  3□Moderate, turbid vitreous appearance with a large number of vacuoles  4□Severe, bullous and / or stromal edema, localized or diffuse, with or without matrix streaks |
| Other corneal lesions | 0□No  1□Yes，Please describe：_________________________________ |

**【Slit Lamp Examination Form (left eye)】-I**

| 3. Anterior chamber (left eye) | |
| --- | --- |
| Cell number | 0□Nil, no cells  1□Slight, 1-5 cells  2□Mild, 6-25 cells  3□Moderate, 26-50 cells  4□Severe, the number of cells is too large to count |
| Anterior chamber flare | 0□Nil, no Tyndall effect  1□Slight, almost cannot distinguish the Tyndall effect  2□Mild, slight brightness  3□Moderate, strong brightness  4□Severe, very strong and aqueous humor is white or milky |
| Other lesions | 0□No  1□Yes，Please describe：_________________________________ |
| 4. Iris / pupil (left eye) | |
| Iris / pupil (right eye) | Clinically significant abnormality：0□No1□Yes，Please describe：_____________ |
| 5. Lens (left eye) | |
| Lens (right eye) | 1□Complete  2□Artificial  3□Nil |
| Other lesions | 0□No  1□Yes，Please describe：_________________________________ |
| Transparency | |
| Cortex | 0□Nil  1□There are turbidity, but below standard pictures 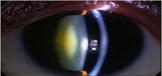  2□There are turbidity, and the severity of the standard picture is the same or more serious 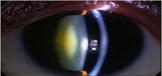  3□Not applicable |
| Nucleus | 0□Nil  1□Turbid, but below standard pictures 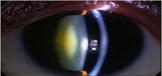  2□Turbid, the same or more serious than standard pictures 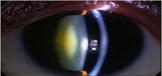  3□Not applicable |
| Posterior capsule | 0□Nil  1□Turbid, but below standard pictures 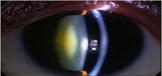  2□Turbid, the same or more serious than standard pictures 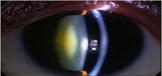  3□Not applicable |

**【Slit Lamp Examination Form (left eye)】-I**

| 6. Vitreum (left eye) | |
| --- | --- |
| Anterior vitreous cell count | 0□Nil, no cells  1□Slight, 1-10 cells  2□Mild, 11-30 cells  3□Moderate, 30-50 cells  4□Severe, >50 cells |
| Other lesions | 0□No  1□Yes，Please describe：_________________________________ |
| Vitreous / anterior retinal hemorrhage | 0□Nil  1□Slight  2□Mild  3□Moderate  4□Severe |
| 7. Macular and retina (left eye) | |
| Macular hole | 0□Nil  1□Hole diameter≤1/3PD  2□Hole diameter＞1/3PD, and≤1/2PD  3□Hole diameter＞1/2PD, and≤1PD  4□Hole diameter＞1PD |
| Retinal detachment | 0□Nil  1□Yes，Please describe：  1□Within the arcade  2□Beyond the arcade, and within the equator  3□Beyond the equator |
| Peripheral retinal split holes | 0□No  1□Yes，Please describe：_________________________________ |
| Posterior scleral staphyloma | 0□No  1□Yes，Please describe：_________________________________ |
| Other lesions | 0□No  1□Yes，Please describe with words or pictures：_________________________________ |

**Attachment 2**

**【Slit Lamp Examination Form (study eye)】-II**

| Whether to have slit lamp examination (study eye)?：1□Yes→Please record as follows，0□No | |
| --- | --- |
| Other lesions of eyelid | 0□No  1□Yes，Please describe：_________________________________ |
| 1. Conjunctiva (study eye) | |
| Congestion | 0□Normal. It may appear white or reddish pink, without peripheral congestion. The conjunctival or bulbar conjunctival vessels are easily observed  1□Slight redness, reddish color, mainly confined to the palpebral conjunctiva or bulbar conjunctiva  2□Mild redness, reddish color, mainly confined to the conjunctiva or bulbar conjunctiva  3□Moderate, palpebral conjunctiva or bulbar conjunctiva is bright red  4□Severe, palpebral conjunctiva or bulbar conjunctiva is deep diffuse bright red |
| Edema | 0□Normal, no swelling  1□Slight, beyond normal and regional  2□Mild, mild conjunctival swelling, beyond normal, regional  3□Moderate, conjunctival swelling moderately  4□Severe, large conjunctival swelling |
| Subconjunctival hemorrhage | 0□Nil, no bleeding  1□Slight, flat and less than 1 quadrant  2□Mild, bulging, and 1 quadrant, or flat and more than 1 quadrants  3□Moderate, bulging and >1 quadrant, but less than 2 quadrants  4□Severe, bulging and more than 2 quadrants |
| Other conjunctival lesions | 0□No  1□Yes，Please describe：_________________________________ |
| 2. Cornea (study eye) | |
| Edema | 0□Nil, transparent and clear  1□Slight, micro and local epithelial haze  2□Mild, turbid vitreous appearance and may contain tiny droplets  3□Moderate, turbid vitreous appearance with a large number of vacuoles  4□Severe, bullous and / or stromal edema, localized or diffuse, with or without matrix streaks |
| Other corneal lesions | 0□No  1□Yes，Please describe：_________________________________ |

**【Slit Lamp Examination Form (study eye)】-II**

| 3. Anterior chamber (study eye) | |
| --- | --- |
| Cell number | 0□Nil, no cells  1□Slight, 1-5 cells  2□Mild, 6-25 cells  3□Moderate, 26-50 cells  4□Severe, the number of cells is too large to count |
| Anterior chamber flare | 0□Nil, no Tyndall effect  1□Slight, almost cannot distinguish the Tyndall effect  2□Mild, slight brightness  3□Moderate, strong brightness  4□Severe, very strong and aqueous humor is white or milky |
| Other lesions | 0□No  1□Yes，Please describe：_________________________________ |
| 4. Iris / pupil (study eye) | |
| Iris / pupil (study eye) | Clinically significant abnormality：0□No1□Yes，Please describe：_____________ |
| 5. Lens (studyeye) | |
| Lens (study eye) | 1□Complete  2□Artificial  3□Nil |
| Other lesions | 0□No  1□Yes，Please describe：_________________________________ |
| Transparency | |
| Cortex | 0□Nil  1□There are turbidity, but below standard pictures 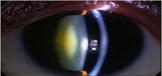  2□There are turbidity, and the severity of the standard picture is the same or more serious 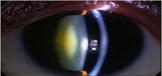  3□Not applicable |
| Nucleus | 0□Nil  1□Turbid, but below standard pictures 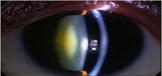  2□Turbid, the same or more serious than standard pictures 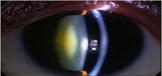  3□Not applicable |
| Posterior capsule | 0□Nil  1□Turbid, but below standard pictures 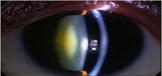  2□Turbid, the same or more serious than standard pictures 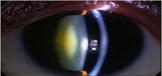  3□Not applicable |

**【Slit Lamp Examination (study eye)】-II**

| 6. Vitreum (study eye) | |
| --- | --- |
| Anterior vitreous cell count | 0□Nil, no cells  1□Slight, 1-10 cells  2□Mild, 11-30 cells  3□Moderate, 30-50 cells  4□Severe, >50 cells |
| Other lesions | 0□No  1□Yes，Please describe：_________________________________ |
| Vitreous / anterior retinal hemorrhage | 0□Nil  1□Slight  2□Mild  3□Moderate  4□Severe |
| Air volume in vitreous cavity | 0□Nil  1□≤30%  2□＞30%，and≤50%  3□＞50%，and≤70%  4□＞70%  5□Not applicable |
| Silicone oil volume in vitreous cavity | 0□Nil  1□＞50%，and≤70%  2□＞70%，and≤90%  3□＞90%  4□Not applicable |
| 7. Macular and retina (research eye) | |
| Macular hole | 0□Nil  1□Hole diameter≤1/3PD  2□Hole diameter＞1/3PD, and≤1/2PD  3□Hole diameter＞1/2PD, and≤1PD  4□Hole diameter＞1PD |
| Retinal detachment | 0□Nil  1□Yes，Please describe：  1□Within the arcade  2□beyond the arcade, and within the equator  3□Beyond the equator |
| Peripheral retinal split holes | 0□No  1□Yes，Please describe：_________________________________ |
| Posterior scleral staphyloma | 0□No  1□Yes，Please describe：_________________________________ |
| Other lesions | 0□No  1□Yes，Please describe with words or pictures：_________________________________ |

**Attachment 3**

**Low vision quality of life questionnaire**

5=Nil；4-2=Moderate；1=Severe；x=Unable to do。

How well do you know about your current vision?：5=Much，1=Little

| 1. Because of your vision, in the following circumstances, do you feel difficult?. | |
| --- | --- |
| 1. Feel tired (for example, only after a short time using eyes)  usingeye use) | □5 □4 □3 □2 □1□x □Others |
| 2. At home at night | □5 □4 □3 □2 □1□x □Others |
| 3. Look at things in the right amount of light | □5 □4 □3 □2 □1□x □Others |
| 4. Feel the light glare (such as car lamp or sun make you dazzle) | □5 □4 □3 □2 □1□x □Others |
| 5. Look at road signs | □5 □4 □3 □2 □1□x □Others |
| 6. Watch TV (or enjoy pictures) | □5 □4 □3 □2 □1□x □Others |
| 7. Look at moving objects (such as cars on the road) | □5 □4 □3 □2 □1□x □Others |
| 8. Determine the distance or depth of objects | □5 □4 □3 □2 □1□x □Others |
| 9. See the stairs or railings | □5 □4 □3 □2 □1□x □Others |
| 10. Walk outdoors (e.g., on an uneven sidewalk) | □5 □4 □3 □2 □1□x □Others |
| 11. Cross the street when there is vehicles | □5 □4 □3 □2 □1□x □Others |
| 12. Generally speaking | □5 □4 □3 □2 □1□x □Others |
| 2. Because of your vision, so you | |
| 1. Not satisfied with your current life | □5 □4 □3 □2 □1□x □Others |
| 2. Be upset about not being able to do some work | □5 □4 □3 □2 □1□x □Others |
| 3. Visiting relatives and friends is limited | □5 □4 □3 □2 □1□x □Others |
| 4..How well do you know about your current vision | □5 □4 □3 □2 □1□x □Others |
| 3. If you use visual aids or glasses, if there are difficulties when doing the following things | |
| 1.Identify uppercase fonts | □5 □4 □3 □2 □1□x □Others |
| 2. Read newspaper articles and books | □5 □4 □3 □2 □1□x □Others |
| 3. Read labels (for example, on a bottle or kit) | □5 □4 □3 □2 □1□x □Others |
| 4. Reading letters | □5 □4 □3 □2 □1□x □Others |
| 5. Use some tools (such as sutures or scissors) | □5 □4 □3 □2 □1□x □Others |
| 4. If you use visual aids or glasses, if there are difficulties when doing the following things | |
| 1. Watch the clock to know the time | □5 □4 □3 □2 □1□x □Others |
| 2. Sign or write cards | □5 □4 □3 □2 □1□x □Others |
| 3. Identify your own handwriting | □5 □4 □3 □2 □1□x □Others |
| 4. Do daily activities (such as housework) | □5 □4 □3 □2 □1□x □Others |
